# Supplementary material for: Cube-shaped hierarchical LiNi1/3Co1/3Mn1/3O2 with enhanced growth of nanocrystal planes as high-performance cathode materials for lithium-ion batteries
Source: Royal Society of Chemistry journal article supplement (doi:10.1039/c5ta03225c), 2015-01-01
Supplement: c5ta03225c1.pdf [file c5ta03225c1.pdf]

## Supplementary Information

### **Cube-shaped hierarchical $\text{LiNi}_{1/3}\text{Co}_{1/3}\text{Mn}_{1/3}\text{O}_2$ with enhanced growth of nanocrystal planes as high-performance cathode materials for lithium-ion batteries**

Yu Wu,<sup>a</sup> Chuanbao Cao,<sup>\*a</sup> Youqi Zhu,<sup>a</sup> Jili Li<sup>b</sup> and Lin Wang<sup>a</sup>

Research Center of Materials Science, Beijing Institute of Technology, Beijing  
100081, China

**Preparation of NCM-bulk:** bulk  $\text{LiNi}_{1/3}\text{Co}_{1/3}\text{Mn}_{1/3}\text{O}_2$  (NCM-bulk) was synthesized by the co-precipitation method reported in the literature.<sup>1</sup> The annealing process was carried out at 850 °C for 12 h in air.

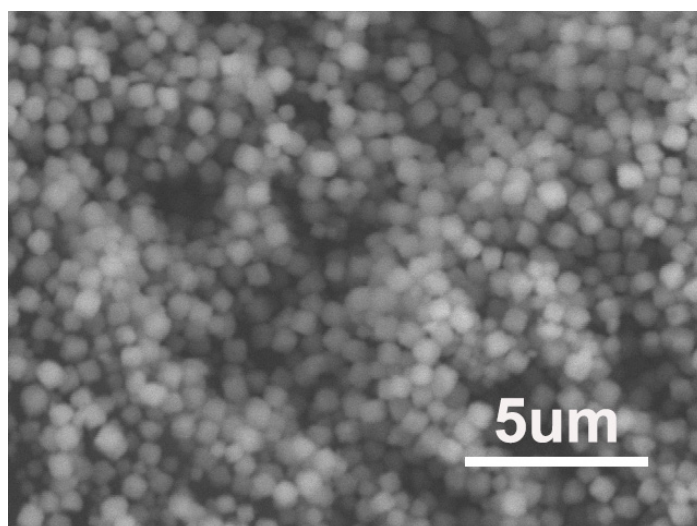

**Fig. S1** SEM image of  $\text{MnCO}_3$  cubes.

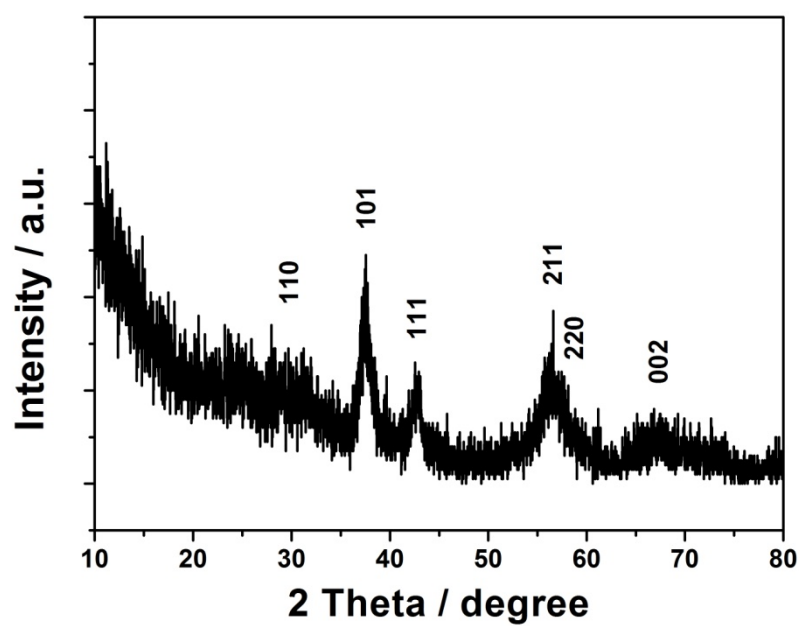

**Fig. S2** XRD pattern of  $\text{MnO}_2$  cubes (JCPDS Card No.: 24-0735).

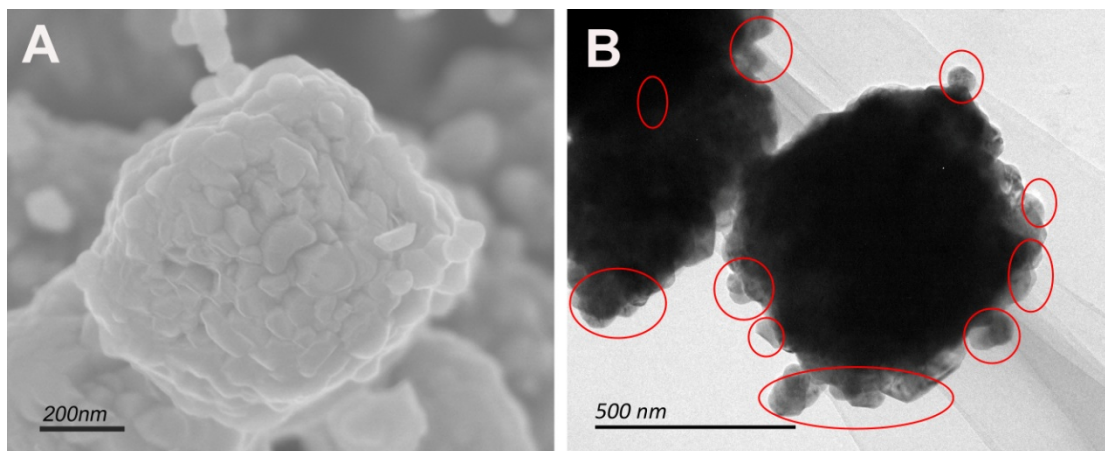

**Fig. S3** (A) SEM image of the CH-NCM; (B) TEM image of the CH-NCM.

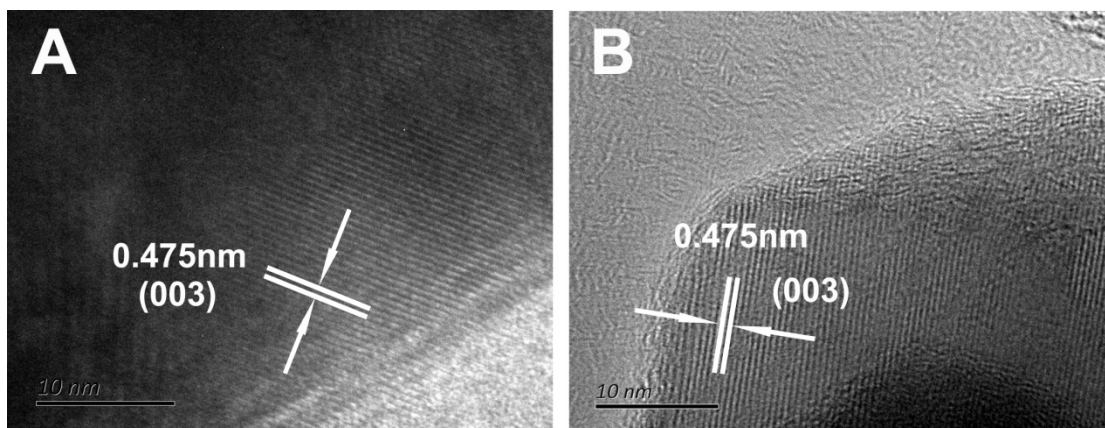

**Fig. S4** (A) and (B) HR-TEM image of the CH-NCM.

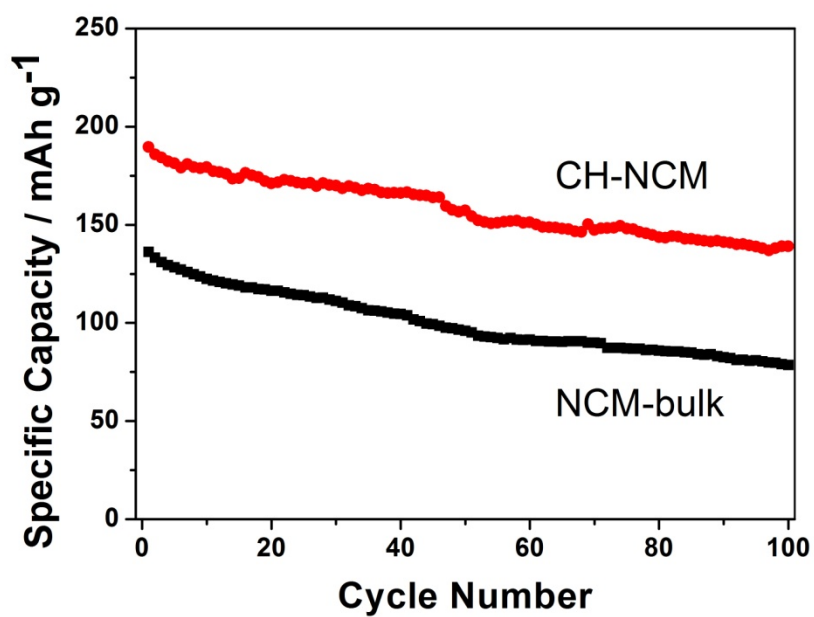

Fig. S5 Comparative cycling performances of CH-NCM and NCM-bulk at 2 C.

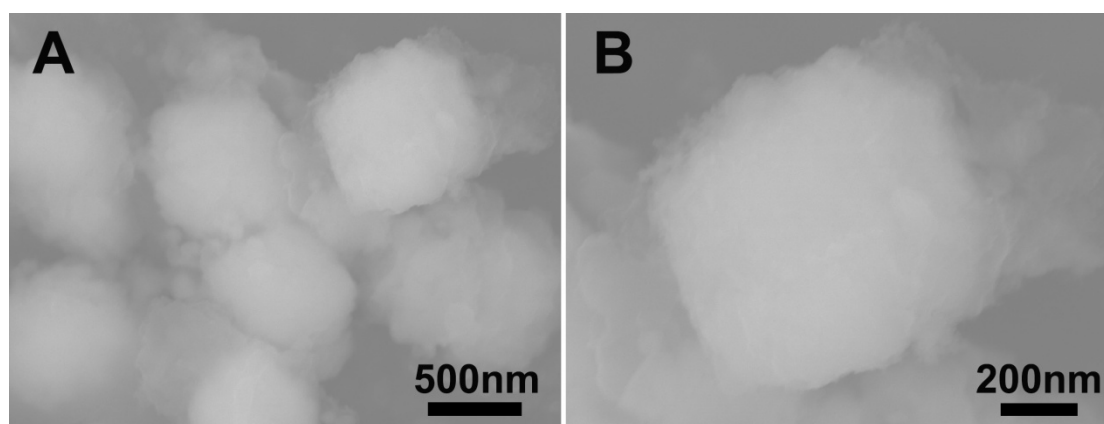

Fig. S6 The morphology of CH-NCM cathodes after 100 charge and discharge cycles at 0.1 C (A) at low magnifications (B) at high magnifications.

**Table S1.** Electrochemical performances for several advanced  $\text{LiNi}_{1/3}\text{Co}_{1/3}\text{Mn}_{1/3}\text{O}_2$  cathode materials

| Structure                | Voltage range (V) | Capacity ( $\text{mAh g}^{-1}$ ) | Reference |
|--------------------------|-------------------|----------------------------------|-----------|
| Hierarchical nanocube    | 2.5-4.5           | 220.9 (0.1C)                     | This work |
|                          |                   | 211.4 (1C)                       |           |
|                          |                   | 171.7 (5C)                       |           |
|                          |                   | 144.5 (10C)                      |           |
| Hollow microsphere       | 2.5-4.5           | 212 (0.1C)                       | 5         |
|                          |                   | 204.8 (1C)                       |           |
|                          |                   | 155.7 (5C)                       |           |
|                          |                   | 135.9 (10C)                      |           |
| microrod                 | 2.8-4.3           | 163.3 (0.1C)                     | 6         |
|                          |                   | 126.9 (10C)                      |           |
| Hollow microsphere       | 2.5-4.6           | 187.1 (0.1C)                     | 9         |
|                          |                   | 145.3 (5C)                       |           |
| Hierarchical microsphere | 2.5-4.5           | 171 (0.1C)                       | 10        |
|                          |                   | 120 (10C)                        |           |
| Nanoplate                | 2.5-4.5           | 207.6 (0.1C)                     | 11        |
|                          |                   | 160.5 (5C)                       |           |
|                          |                   | 149.3 (7C)                       |           |
| Ordered crystal          | 2.5-4.4           | 197.9 (0.1C)                     | 12        |
|                          |                   | 120.9 (8C)                       |           |
| nanoflower               | 2.7-4.3           | 161 (0.2C)                       | 13        |
|                          |                   | 126 (20C)                        |           |
| Hierarchical microsphere | 2.5-4.4           | 196 (0.1C)                       | 14        |
|                          |                   | 78 (3C)                          |           |

## References

1. J. X. Zhu, T. Vo, D. S. Li, R. Lu, N. Kinsinger, L. Xiong, Y. S. Yan and D. Kisailus, *Cryst. Growth Des.*, 2012, 12, 1118.
